# Supplementary material
Source: publisher figshare collection journal article supplement (https://tandf.figshare.com/articles/dataset/_/1476247)
Supplement: Supplementary file 1 [file 4]

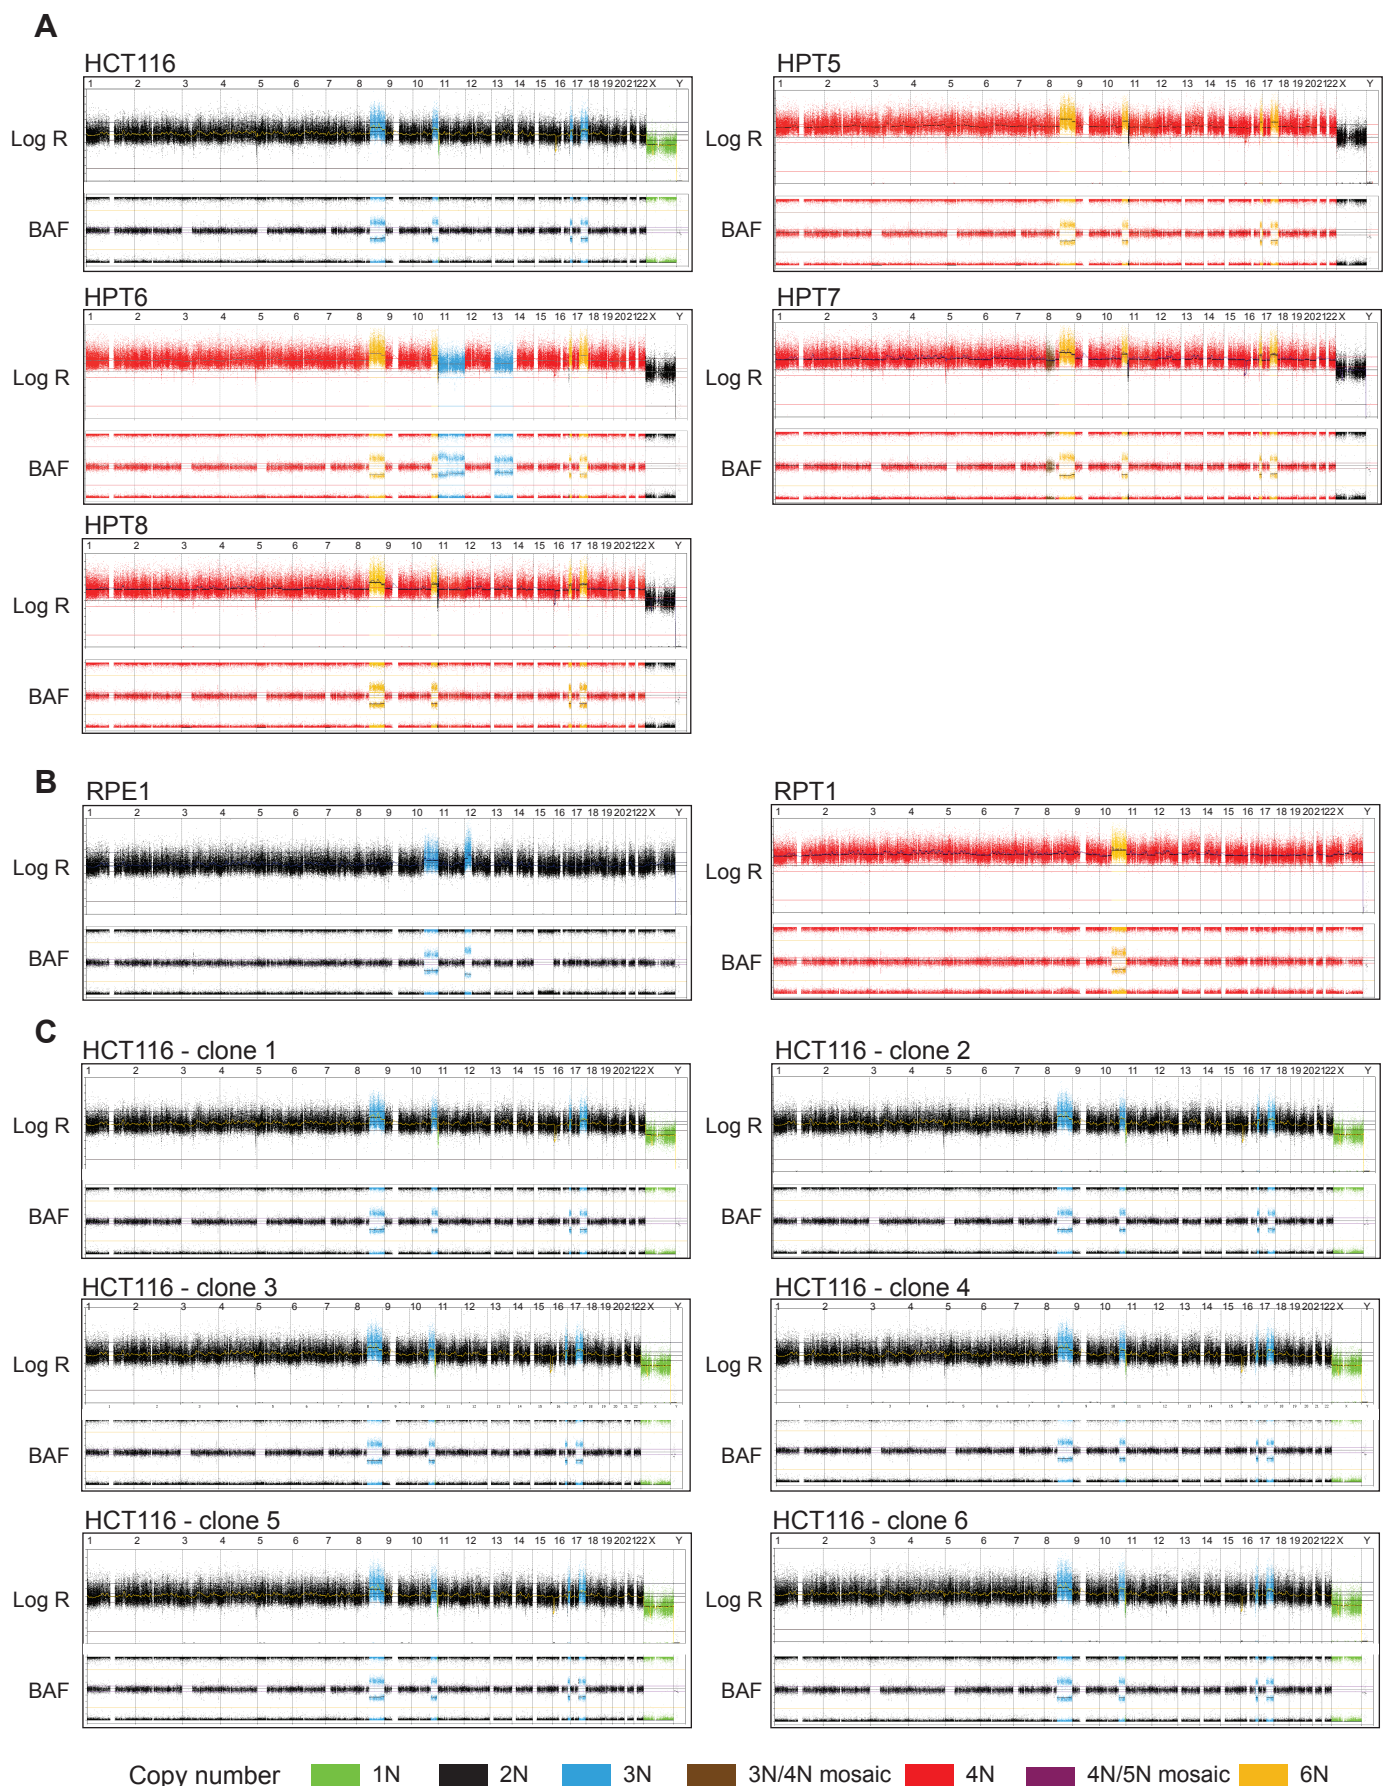

**Supplementary figure S2. Single nucleotide polymorphism array (SNP) analysis of the posttetraploid cell lines and their respective controls**

(A) SNParray results in HCT116 and its posttetraploid derivatives HPT5-8. (B) Single nucleotide polymorphism (SNP) array results in RPE1 and its posttetraploid derivative RPT1. (C) Copy number changes in clones derived from individual HCT116 cells after 80 generations analyzed by SNP arrays. Six examples are shown, 12 samples were analyzed in total. All plots: The log R represents the copy number; B-allele frequency (BAF) indicates the allele composition: BAF of 0 or 1 represents genotype of AA / A- / BB / B-, respectively; BAF of 0.5 represents AB.
