# Supplementary material
Source: publisher figshare collection journal article supplement (https://tandf.figshare.com/articles/dataset/_/1476247)
Supplement: Supplementary file 3 [file 4]

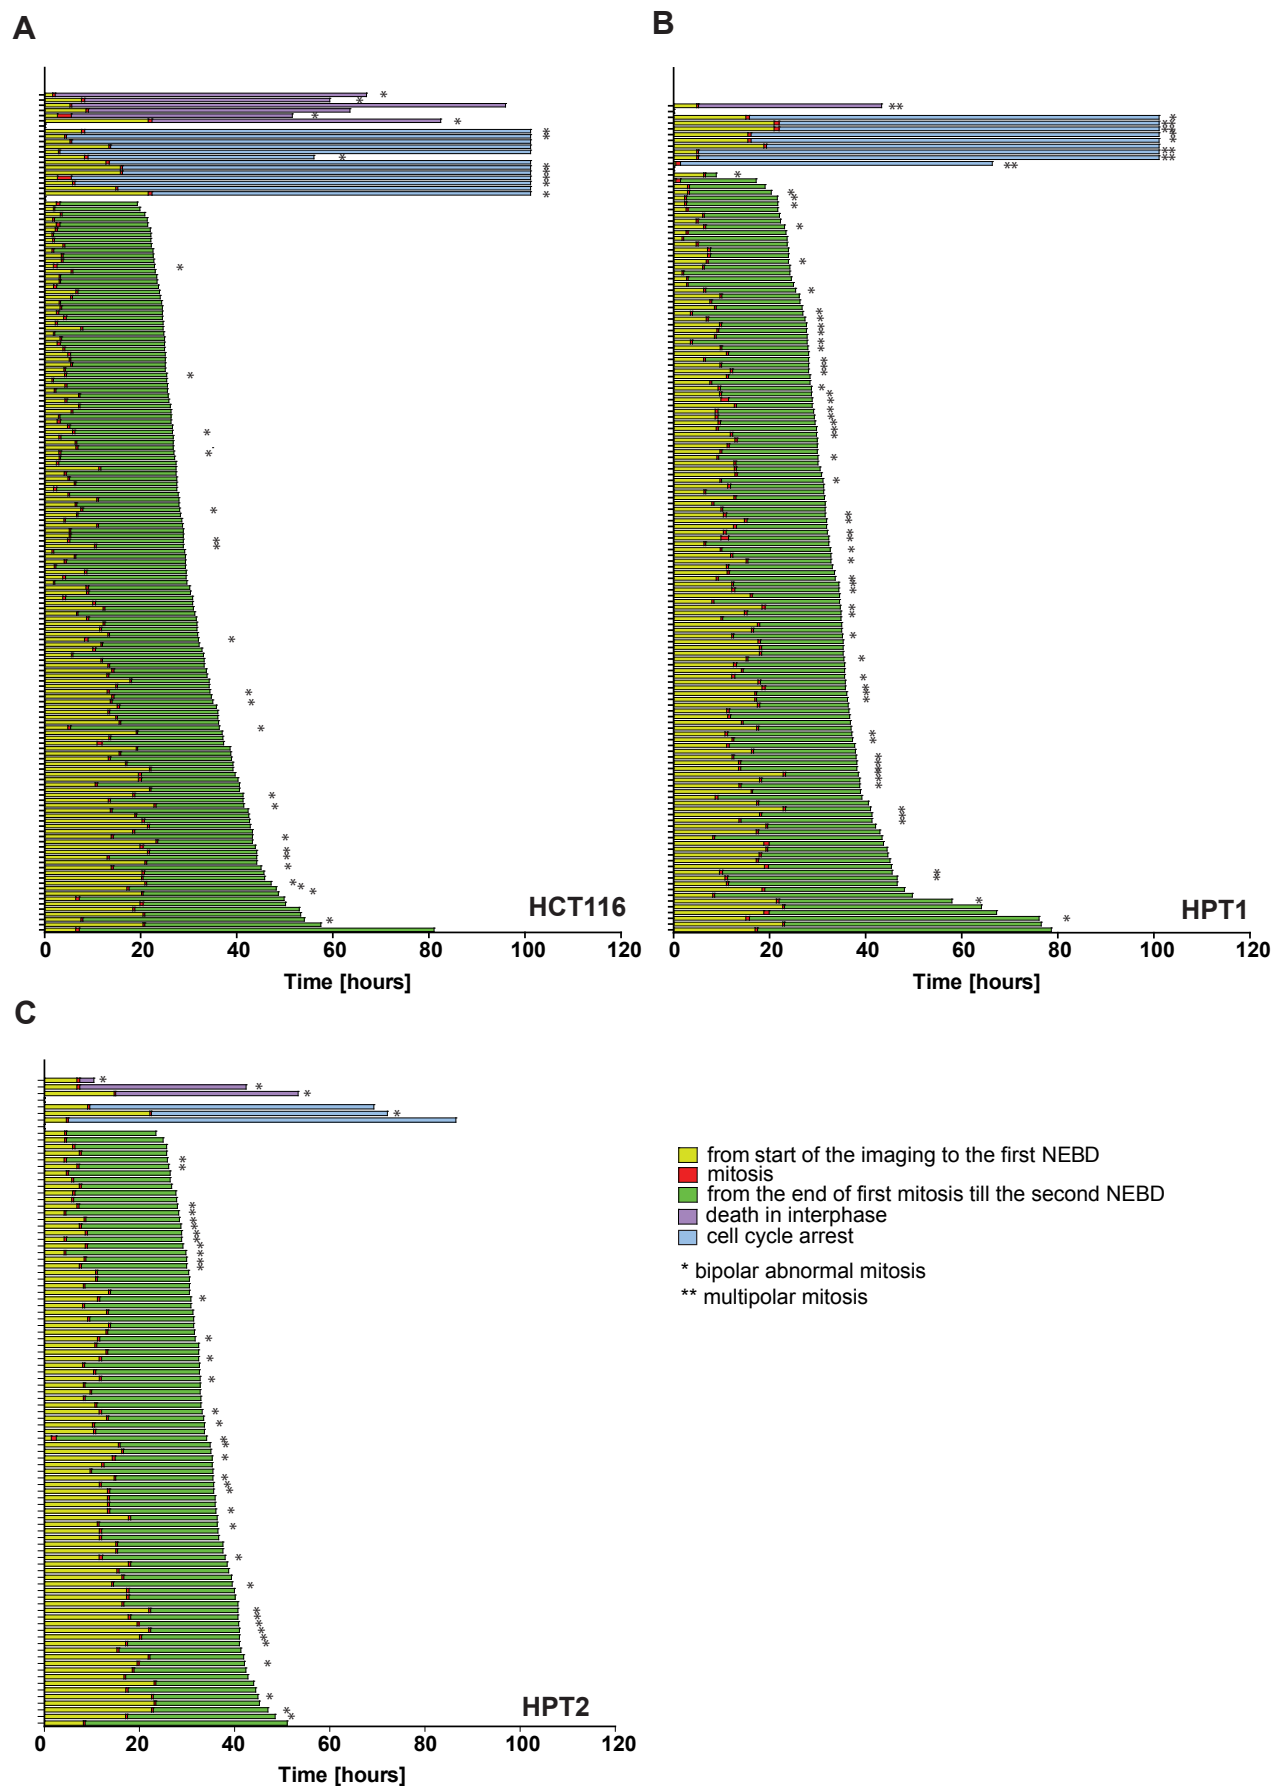

### Supplementary Figure S6. Fate analysis of HCT116 and HPTs

Single cell analysis of cellular fate after progression through mitosis in HCT116 (A), HPT1 (B) and HPT2 (C) cell line. One representative experiment out of four is shown. NEBD - nuclear envelope break down.
