# Supplementary material
Source: publisher figshare collection journal article supplement (https://tandf.figshare.com/articles/dataset/_/1476247)
Supplement: Supplementary file 4 [file 4]

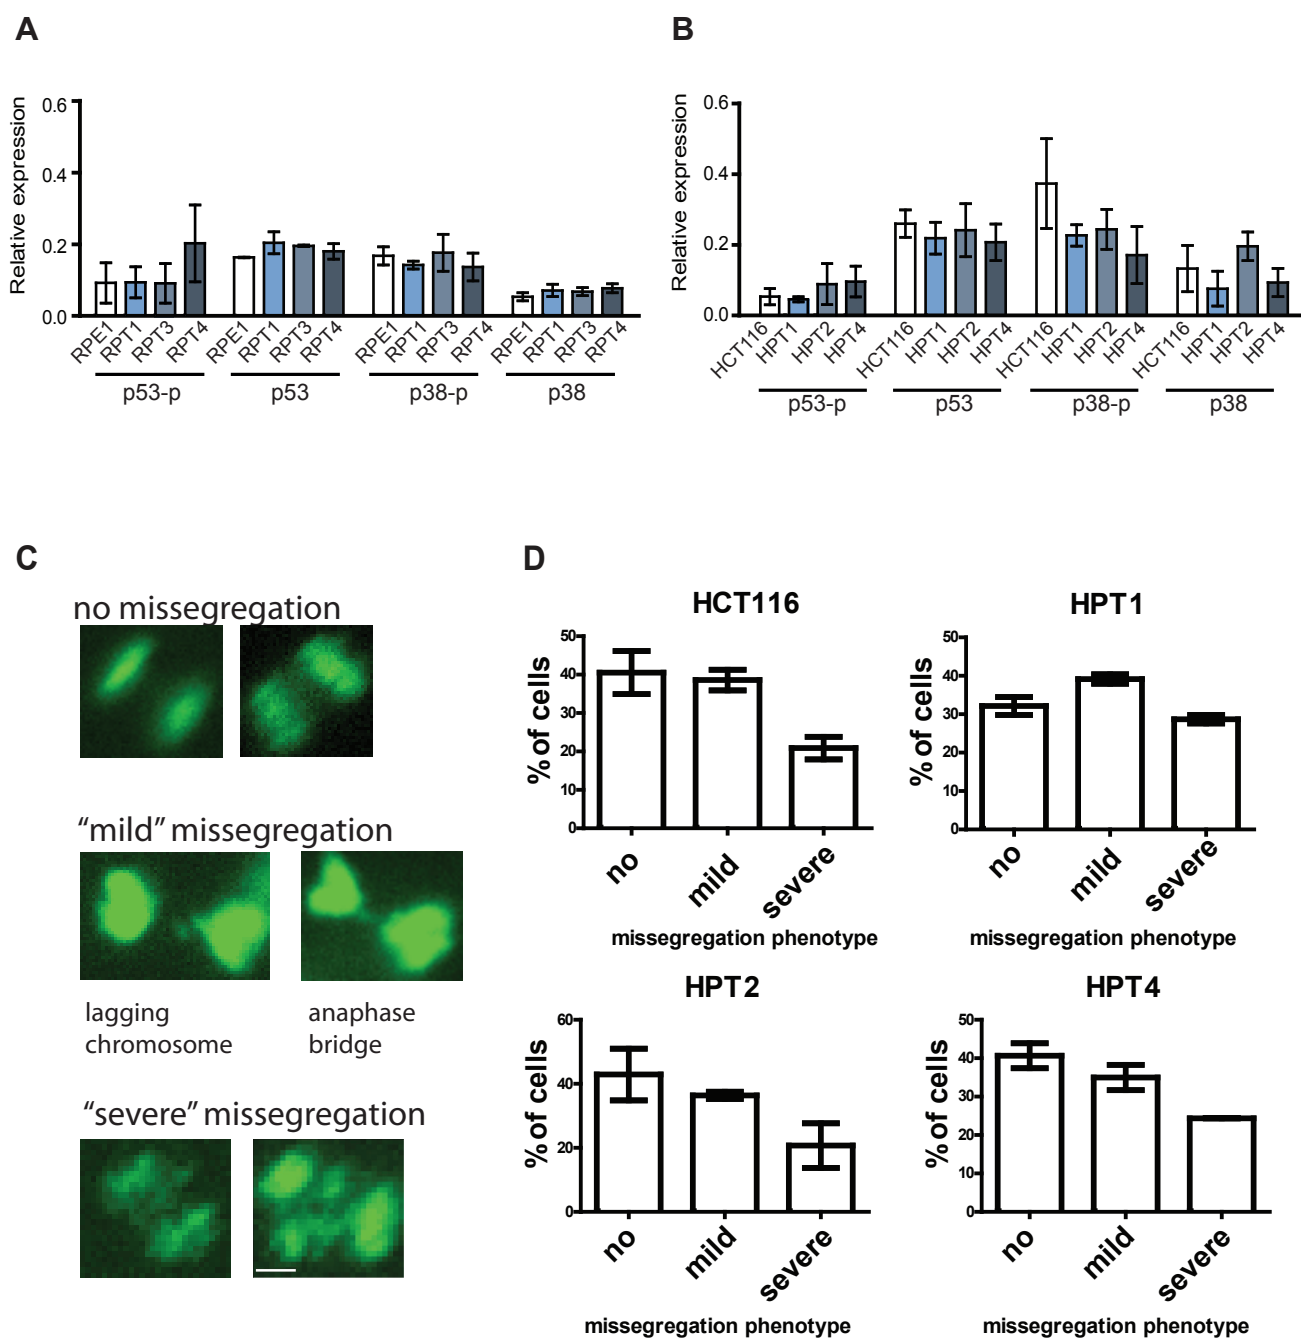

### Supplementary Figure S7. Analysis of the p53 and p38 pathway activation in response to segregation errors

(A) Levels of phosphorylated and total p53 and p38 in untreated RPE1 and its posttetraploid derivatives. (B) Levels of phosphorylated and total p53 and p38 in untreated HCT116 and its posttetraploid derivatives. Means of three independent experiments with SD are plotted in both (A) and (B). (C) Examples of mitotic figures scored upon VS83: normal segregation, mild missegregation or severe missegregation. DNA stained with SYTOX Green (objective 63x, bar: 10  $\mu$ M). (D) Quantifications of the live cell imaging after VS83 washout. Y-axes: percentage of cells that showed the specified mitotic phenotype. Mean of three experiments with SD is shown.
