# Supplementary material
Source: publisher figshare collection journal article supplement (https://tandf.figshare.com/articles/dataset/_/1476247)
Supplement: Supplementary file 6 [file 4]

**A**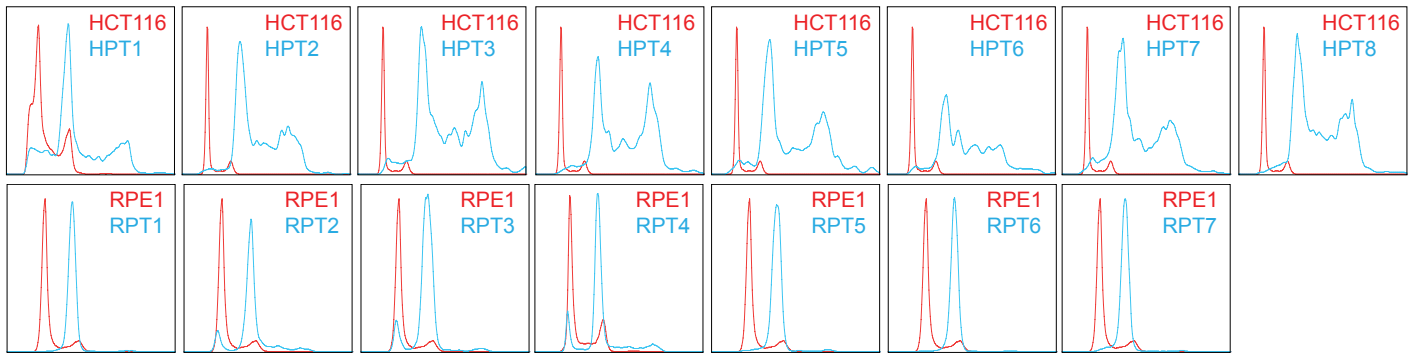**B**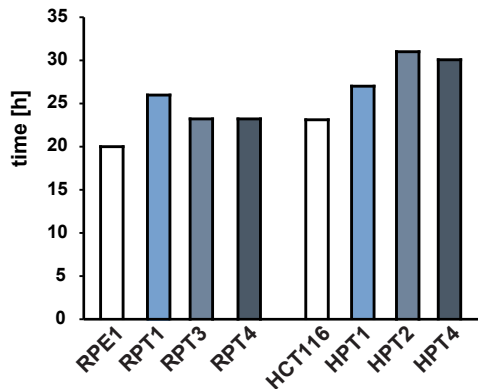**C**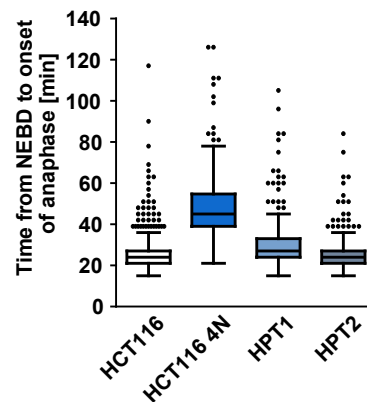**D**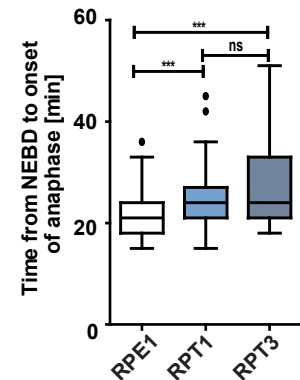**E**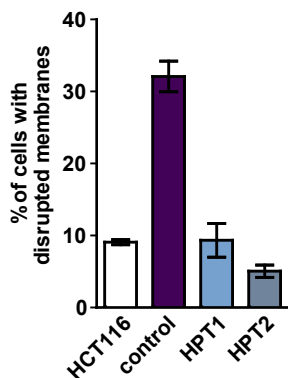**F**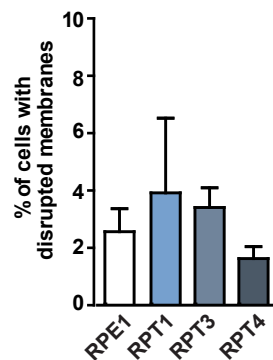**G**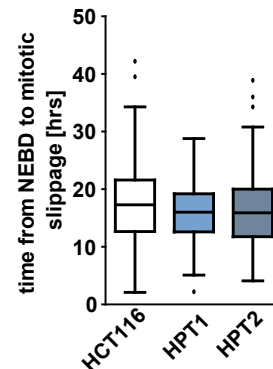

## Supplementary Figure S1. Characterization of the posttetraploid cell lines

(A) DNA content profile of HPTs and RPTs assessed by flow cytometry after propidium-iodide staining of DNA. (B) Doubling time in RPTs, HPTs and the respective parental controls. Mean of two experiments is shown. (C) Time in mitosis in the diploid control and HPTs measured from NEBD to the anaphase onset; Tukey range and median of four experiments are plotted. (D) Time in mitosis in the diploid control and RPTs measured from NEBD to the anaphase onset; Tukey range and median of four experiments are plotted. (E) Percentage of propidium iodide-positive cells in HCT116 and HPTs and in (F) RPE1 and RPTs. Treatment with protein kinase inhibitor staurosporine was used as a positive control for cell death; mean and SEM of two experiments. (G) Time from the NEBD to mitotic slippage in the presence of 200 ng/ml of nocodazole, median and Tukey range of three experiments.
